# Supplementary material
Source: PubMed Central journal article supplement (PMC2754196)
Supplement: NIHMS133117-supplement-Supplementary_table_1.pdf [file NIHMS133117-supplement-Supplementary_table_1.pdf]

1 **SUPPLEMENTAL MATERIAL**

2 **Generation of hyper-immune bovine sera.** Hyperimmune sera were obtained from  
3 cattle experimentally inoculated with *E. coli* O157 strains of both cattle and human origin  
4 (1), which included the strain EDL933, one of the sequenced O157 strains (2). The  
5 rationale was that exposure of these cattle to diverse O157 strains of both lineage I and  
6 II (3) might engender antibody responses against a wider variety of protein antigens  
7 expressed in the gastrointestinal tract (GIT) of cattle rendering the hyperimmune sera  
8 optimal for profiling the immunoproteome of this organism in the bovine reservoir.  
9 Cattle were first confirmed to be negative for O157 colonization using highly sensitive  
10 recto-anal swab culture techniques (1), and then inoculated once orally with  $10^{10}$  CFU of  
11 each strain (1). Serum samples, collected from nine cattle that had remained culture  
12 positive for up to two months (1) following experimental inoculation, demonstrated high  
13 titers of anti-O157 lipopolysaccharide (LPS) antibodies (1). Preimmune sera were also  
14 collected from the same animals prior to inoculation.

15

16 **Preliminary evaluation of reactivity of pooled hyperimmune sera.** We assessed  
17 the quality of pooled hyperimmune sera, by reacting them with previously identified,  
18 secreted O157 proteins encoded in the locus of enterocyte effacement (LEE) (4). Cattle  
19 immunized with such proteins, including those expressed from the LEE, reportedly show  
20 decreased shedding of O157 (4). We first confirmed reactivity of hyper-immune cattle  
21 sera with O157 lipopolysaccharide (LPS) purified in our laboratory using a protocol  
22 described previously (5). We then amplified genes encoding full-length EspB from  
23 O157 strain EDL933 (test), and PilA from *Vibrio cholerae* El Tor N16961 (control), and

1 cloned them into the expression vector, pET-30b (Novagen, Inc., Madison, WI.) under  
2 control of the phage T7 promoter. Following confirmation of in-frame cloning via gene  
3 sequencing, we transformed plasmids into *E. coli* BL21(DE3). Recombinant clones  
4 were induced with isopropyl- $\beta$ -D-thiogalactopyranoside (IPTG) and probed in a colony  
5 immunoblot assay with pooled, hyper-immune cattle sera adsorbed against purified  
6 O157 LPS, as described previously by our group (6). None of the above recombinant  
7 clones reacted with pooled, pre-immune cattle sera (data not shown).

8

9 **Affinity-purification of PABs from hyperimmune sera.** Prior to affinity purification,  
10 we pooled hyperimmune sera from nine cattle to compensate for variations in individual  
11 immune responses and identify a wider complement of O157 proteins expressed within  
12 the GIT of bovine reservoirs. PABs from 1 ml of pooled hyperimmune cattle sera were  
13 purified using HiTrap Protein G HP (5 ml) columns (Amersham Biosciences,  
14 Piscataway, NJ), as recommended by the manufacturer with a few modifications.  
15 Briefly, pooled sera were diluted 1:4 in binding buffer (0.02 M Sodium phosphate buffer,  
16 pH 7.0), and then loaded using a syringe onto a protein G column equilibrated with ten  
17 volumes of binding buffer. Protein G binds all IgG subclasses but not other  
18 immunoglobulin isotypes (7). Following a wash with ten volumes of binding buffer,  
19 bound IgG PABs were eluted with 4 ml of elution buffer (0.1 M Glycine, pH 2.7), directly  
20 into five tubes each containing 200  $\mu$ l of 1M Tris-HCl, pH 9.0. Affinity-purified IgG PABs  
21 (“Bait” PABs) were quantified using a nomograph (8) and prepared for coupling.

22

## 1 REFERENCES

- 2 1. Rice, D.H., Sheng, H.Q., Wynia, S.A., and Hovde, C.J. (2003) Rectoanal  
3 Mucosal Swab Culture Is More Sensitive Than Fecal Culture and Distinguishes  
4 *Escherichia coli* O157:H7-Colonized Cattle and Those Transiently Shedding the  
5 Same Organism. *J. Clin. Microbiol.* **41**, 4924-4929.
- 6 2. Perna, N.T., Plunkett, G., Burland, V., Mau, B., Glasner, J.D., Rose, D.J.,  
7 Mayhew, G.F., Evans, P.S., Gregor, J., Kirkpatrick, H.A., Posfai, G., Hackett, J.,  
8 Klink, S., Boutin, A., Shao, Y., Miller, L., Grotbeck, E.J., Davis, N.W., Lim, A.,  
9 Dimalanta, E.T., Potamousis, K.D., Apodaca, J., Anantharaman, T.S., Lin, J.,  
10 Yen, G., Schwartz, D.C., Welch, R.A., and Blattner, F.R. (2001) Genome  
11 sequence of enterohaemorrhagic *Escherichia coli* O157:H7. *Nature* **409**, 529-  
12 533.
- 13 3. Kim, J., Nietfeldt, J., and Benson, A.K. (1999) Octamer-based genome scanning  
14 distinguishes a unique subpopulation of *Escherichia coli* O157:H7 strains in  
15 cattle. *Proc. Natl. Acad. Sci.* **96**, 13288-13293.
- 16 4. Potter, A.A., Klashinsky, S., Li, Y., Frey, E., Townsend, H., Rogan, D., Erickson,  
17 G., Hinkley, S., Klopfenstein, T., Moxley, R.A., Smith, D.R., and Finlay, B.B.  
18 (2004) Decreased shedding of *Escherichia coli* O157:H7 by cattle following  
19 vaccination with type III secreted proteins. *Vaccine* **22**, 362-369.
- 20 5. Inzana, T.J. (1983) Electrophoretic heterogeneity and interstrain variation of the  
21 lipopolysaccharide of *Haemophilus influenzae*. *J Infect Dis* **148**, 492-499.
- 22 6. John, M., Kudva, I.T., Griffin, R.W., Dodson, A.W., McManus, B., Krastins, B.,  
23 Sarracino, D., Progulske-Fox, A., Hillman, J.D., Handfield, M., Tarr, P.I., and  
24 Calderwood, S.B. (2005) Use of In Vivo-Induced Antigen Technology for  
25 Identification of *Escherichia coli* O157:H7 Proteins Expressed during Human  
26 Infection. *Infect. Immun.* **73**, 2665-2679.
- 27 7. Harlow, E. and Lane, D. (1998) *Antibodies-A Laboratory Manual*. (Cold Spring  
28 Harbor Laboratory, New York).
- 29 8. Bollag, D.M., Rozycki, M.D., and Edelstein, J.S. (1996) *Protein Methods*. (Wiley-  
30 Liss, Inc., New York).
- 31 9. Dziva, F., van Diemen, P.M., Stevens, M.P., Smith, A.J., and Wallis, T.S. (2004)  
32 Identification of *Escherichia coli* O157 : H7 genes influencing colonization of the  
33 bovine gastrointestinal tract using signature-tagged mutagenesis. *Microbiology*  
34 **150**, 3631-3645.

37

**Supplementary Table 1. *In vivo*-expressed O157 proteins identified by PELS in cattle.**

| No. | Region in the EDL 933 genome / pO157 associated with the protein <sup>1</sup> | Protein/Function <sup>2</sup>                                                                                                                         | Bacterial cell localization <sup>3</sup> | No. peptide hits | Percent protein coverage | Identical or Related proteins expressed <i>in vivo</i> in: |                                             |
|-----|-------------------------------------------------------------------------------|-------------------------------------------------------------------------------------------------------------------------------------------------------|------------------------------------------|------------------|--------------------------|------------------------------------------------------------|---------------------------------------------|
|     |                                                                               |                                                                                                                                                       |                                          |                  |                          | Calves as identified by STM <sup>4</sup>                   | Humans as identified by IVIAT <sup>4</sup>  |
| 1.  | Backbone                                                                      | EcnB / entericidin B; bacteriolytic lipoprotein; putative toxin of osmotically regulated toxin-antitoxin system associated with programmed cell death | Extracellular                            | 1                | 40%                      | -                                                          | -                                           |
| 2.  | Backbone                                                                      | OmpA / outer membrane protein 3a (II*;G;d); adhesin                                                                                                   | Outer membrane                           | 42               | 43%                      | -                                                          | -                                           |
| 3.  | Backbone                                                                      | Lpp (Murein-lipoprotein) / major outer membrane, murein sacculus, peptidoglycan lipoprotein precursor (OmpT-like)                                     | Outer membrane                           | 7                | 62%                      | -                                                          | MepA, MltB, Slt / murein sacculus synthesis |
| 4.  | Backbone                                                                      | OmpC / outer membrane protein 1b (Ib;c); outer membrane constituents                                                                                  | Outer membrane                           | 4                | 10%                      | -                                                          | -                                           |
| 5.  | O-island # 43                                                                 | Z1178 (Iha) / adhesin; exogenous ferric siderophore receptor R4                                                                                       | Outer membrane                           | 4                | 8%                       | Z1182 / 1726 bp 5' of Z1178 (Iha) adhesin                  | -                                           |

|     |                |                                                                                                                           |                |   |     |                                                                   |                                                                                                 |
|-----|----------------|---------------------------------------------------------------------------------------------------------------------------|----------------|---|-----|-------------------------------------------------------------------|-------------------------------------------------------------------------------------------------|
| 6.  | O-island # 140 | ChuA / heme/hemoglobin receptor (Heme utilization/transport protein)                                                      | Outer membrane | 1 | 2%  | -                                                                 | HemK / heme biosynthesis, CcmH / heme lyase                                                     |
| 7.  | O-island # 36  | Z0975 / putative tail component of prophage CP-933K                                                                       | Outer membrane | 3 | 2%  | Z0990 / type III secreted protein encoded within prophage CP-933K | Z0975                                                                                           |
| 8.  | O-island # 52  | Z1931 / outer membrane protein 3b (a), protease VII / enzyme; outer membrane constituents encoded within prophage CP-933X | Outer membrane | 7 | 15% | Z1930 / putative protease encoded within prophage CP-933X         | -                                                                                               |
| 9.  | Backbone       | TolC / Outer membrane channel; specific tolerance to colicin E1; segregation of daughter chromosomes; cell division       | Outer membrane | 3 | 5%  | -                                                                 | -                                                                                               |
| 10. | Backbone       | FhuE / outer membrane receptor for ferric iron uptake                                                                     | Outer membrane | 2 | 5%  | -                                                                 | FhuA / outer membrane protein receptor for ferrichrome, colicin M, and phages T1, T5, and phi80 |
| 11. | pO157          | EspP / serine protease; putative exoprotein-precursor                                                                     | Outer membrane | 1 | 1%  | -                                                                 | -                                                                                               |

|     |                |                                                                                                                                                            |                |   |     |                                                                                                       |                                                                                |
|-----|----------------|------------------------------------------------------------------------------------------------------------------------------------------------------------|----------------|---|-----|-------------------------------------------------------------------------------------------------------|--------------------------------------------------------------------------------|
| 12. | Backbone       | OmpF / outer membrane protein 1a (Ia;b;F); outer membrane constituents                                                                                     | Outer membrane | 2 | 6%  | -                                                                                                     | -                                                                              |
| 13. | Backbone       | LamB / phage lambda receptor protein; maltose high-affinity receptor ; IS, phage, Tn; transport of small molecules: carbohydrates, organic acids, alcohols | Outer membrane | 1 | 4%  | -                                                                                                     | -                                                                              |
| 14. | Backbone       | HflK / protease specific for phage lambda cII repressor; enzyme; macromolecule degradation: degradation of proteins, peptides                              | Outer membrane | 2 | 6%  | -                                                                                                     | HflX / GTP-binding subunit of protease specific for phage lambda cII repressor |
| 15. | O-island # 148 | EspB / LEE encoded type III secreted protein; formation of pore along with EspD on host cell membrane                                                      | Outer membrane | 4 | 23% | EspD / LEE encoded type III secreted protein; formation of pore along with EspB on host cell membrane | -                                                                              |
| 16. | Backbone       | HlpA / histone-like protein, located in outer membrane or nucleoid; factor; Nucleoid-related functions                                                     | Outer membrane | 1 | 6%  | -                                                                                                     | -                                                                              |
| 17. | Backbone       | OmpX / outer membrane protein X ; membrane; Cell envelop: Outer membrane constituents                                                                      | Outer membrane | 1 | 7%  | -                                                                                                     | -                                                                              |

|     |               |                                                                                                                                                                         |                   |   |    |   |                                                                                                                                                                                               |
|-----|---------------|-------------------------------------------------------------------------------------------------------------------------------------------------------------------------|-------------------|---|----|---|-----------------------------------------------------------------------------------------------------------------------------------------------------------------------------------------------|
| 18. | Backbone      | YeaF / hypothetical protein ;<br>unknown function                                                                                                                       | Outer<br>membrane | 1 | 5% | - | YeaA / hypothetical<br>protein; unknown<br>function                                                                                                                                           |
| 19. | Backbone      | CirA / outer membrane receptor<br>for iron-regulated colicin I<br>receptor; porin; requires tonB<br>gene product; Cell envelop:<br>Outer membrane constituents          | Outer<br>membrane | 1 | 2% | - | CirA                                                                                                                                                                                          |
| 20. | O-island # 36 | Z0955 / hypothetical protein<br>encoded by prophage CP-933K;<br>unknown function                                                                                        | Outer<br>membrane | 3 | 8% | - | -                                                                                                                                                                                             |
| 21. | Backbone      | FepA / outer membrane receptor<br>for ferric enterobactin<br>(enterochelin) and colicins B and<br>D; Transport of small molecules:<br>Cations                           | Outer<br>membrane | 1 | 2% | - | -                                                                                                                                                                                             |
| 22. | Backbone      | MalE / maltose-binding protein;<br>substrate recognition for<br>transport and chemotaxis;<br>transport of small molecules:<br>carbohydrates, organic acids,<br>alcohols | Periplasm         | 2 | 8% | - | Mal F / maltose<br>permease,<br>MalS / alpha<br>amylase,<br>MaLY / enzyme that<br>may degrade or<br>block biosynthesis of<br>endogenous mal<br>inducer,<br>MalZ / maltodextrin<br>glucosidase |

|     |          |                                                                                                                                                         |           |   |    |   |                                                                                                                                                                                             |
|-----|----------|---------------------------------------------------------------------------------------------------------------------------------------------------------|-----------|---|----|---|---------------------------------------------------------------------------------------------------------------------------------------------------------------------------------------------|
| 23. | Backbone | ToIB / protein involved in the tonb-independent uptake of group A colicins; colicin-related functions                                                   | Periplasm | 1 | 4% | - | -                                                                                                                                                                                           |
| 24. | Backbone | FkpA / FKBP-type peptidyl-prolyl cis-trans isomerase (rotamase); enzyme; macromolecule synthesis, modification: proteins - translation and modification | Periplasm | 1 | 6% | - | -                                                                                                                                                                                           |
| 25. | Backbone | YbeJ / putative periplasmic binding transport protein; putative transport                                                                               | Periplasm | 1 | 6% | - | -                                                                                                                                                                                           |
| 26. | Backbone | GlnH / periplasmic glutamine-binding protein; permease; transport; transport of small molecules: amino acids, amines                                    | Periplasm | 1 | 8% | - | GlnG / response regulator for <i>gln</i> operon; interacts with sensor GlnL<br>GlnL / histidine protein kinase sensor for the GlnG regulator<br>Both are involved in glutamine biosynthesis |
| 27. | Backbone | Mdh / malate dehydrogenase; enzyme; energy metabolism, carbon: TCA cycle                                                                                | Periplasm | 1 | 4% | - | -                                                                                                                                                                                           |



|     |              |                                                                                                                   |           |   |     |   |   |
|-----|--------------|-------------------------------------------------------------------------------------------------------------------|-----------|---|-----|---|---|
| 28. | Backbone     | Z2267 / hypothetical protein yncE precursor; putative receptor                                                    | Periplasm | 4 | 10% | - | - |
| 29. | Backbone     | YaeC / putative lipoprotein, D-methionine transport protein; D-methionine-binding lipoprotein metQ precursor      | Periplasm | 1 | 6%  | - | - |
| 30. | Backbone     | SdhA / succinate dehydrogenase, flavoprotein subunit ; enzyme; energy metabolism, carbon: TCA cycle               | Periplasm | 1 | 3%  | - | - |
| 31. | Backbone     | DppA / dipeptide transport protein ; transport; Transport of large molecules: Protein, peptide secretion          | Periplasm | 1 | 2%  | - | - |
| 32. | Backbone     | YahO / hypothetical protein ; unknown function                                                                    | Periplasm | 1 | 9%  | - | - |
| 33. | O-island # 7 | Z0269 / hypothetical protein; unknown function (Rhs Element Associated)                                           | Periplasm | 3 | 4%  | - | - |
| 34. | Backbone     | RbsB / D-ribose periplasmic binding protein; Transport of small molecules: Carbohydrates, organic acids, alcohols | Periplasm | 3 | 17% | - | - |

|     |          |                                                                                                                                       |           |   |     |   |                                                                                                                     |
|-----|----------|---------------------------------------------------------------------------------------------------------------------------------------|-----------|---|-----|---|---------------------------------------------------------------------------------------------------------------------|
| 35. | Backbone | OsmY / hyperosmotically inducible periplasmic protein; osmotic adaptation                                                             | Periplasm | 7 | 26% | - | OsmY                                                                                                                |
| 36. | Backbone | Z3065 / hypothetical protein; unknown function                                                                                        | Periplasm | 1 | 6%  | - | -                                                                                                                   |
| 37. | Backbone | Prc / carboxy-terminal protease for penicillin-binding protein 3; Macromolecule degradation: Degradation of proteins, peptides, glyco | Periplasm | 1 | 2%  | - | -                                                                                                                   |
| 38. | Backbone | ArgT / lysine-, arginine-, ornithine-binding periplasmic protein; transport; Transport of small molecules: Amino acids, amines        | Periplasm | 1 | 6%  | - | -                                                                                                                   |
| 39. | Backbone | OppA / oligopeptide transport; periplasmic binding protein; transport; Transport of large molecules: Protein, peptide secretion       | Periplasm | 5 | 8%  | - | OppB / oligopeptide transport permease protein; transport; Transport of large molecules: Protein, peptide secretion |
| 40. | Backbone | SodC / superoxide dismutase precursor (Cu-Zn); enzyme; Protection responses: Detoxification                                           | Periplasm | 1 | 6%  | - | -                                                                                                                   |

|     |          |                                                                                                                                                   |                |   |     |   |      |
|-----|----------|---------------------------------------------------------------------------------------------------------------------------------------------------|----------------|---|-----|---|------|
| 41. | Backbone | XasA (GadC) / acid sensitivity protein, putative transporter; Probable glutamate/gamma-aminobutyrate antiporter                                   | Inner membrane | 6 | 3%  | - | -    |
| 42. | Backbone | PspA / phage shock protein A; prophage and phage-related functions; adaptations, atypical conditions; negative regulatory gene for the psp operon | Inner membrane | 1 | 7%  | - | -    |
| 43. | Backbone | AtpF / ATP synthase, F0 sector, B chain; enzyme; ATP-proton motive force interconversion                                                          | Inner membrane | 1 | 8%  | - | -    |
| 44. | Backbone | AtpB / membrane-bound ATP synthase, F0 sector, subunit a ; enzyme; ATP-proton motive force interconversion                                        | Inner membrane | 3 | 21% | - | -    |
| 45. | Backbone | YleB / putative 2-polyprenyl-6-methoxyphenol hydroxylase and related FAD-dependent oxidoreductase; unknown function                               | Inner membrane | 1 | 5%  | - | YleB |
| 46. | Backbone | CysK / cysteine synthase A, O-acetylserine sulfhydrylase A; enzyme; Amino acid biosynthesis: Cysteine                                             | Inner membrane | 2 | 8%  | - | -    |

|     |          |                                                                                                                                                                     |                |   |     |   |                                                                                                                                                    |
|-----|----------|---------------------------------------------------------------------------------------------------------------------------------------------------------------------|----------------|---|-----|---|----------------------------------------------------------------------------------------------------------------------------------------------------|
| 47. | Backbone | DnaC / chromosome replication; initiation and chain elongation; putative enzyme; Macromolecule synthesis, modification: DNA - replication, repair, restr./modific'n | Inner membrane | 1 | 5%  | - | -                                                                                                                                                  |
| 48. | Backbone | DsbB / reoxidizes DsbA protein following formation of disulfide bond in P-ring of flagella; enzyme; Cell exterior constituents: Surface structures                  | Inner membrane | 1 | 8%  | - | DsbA /protein disulfide isomerase I, essential for cytochrome c synthesis and formate-dependent reduction; Proteins - translation and modification |
| 49. | Backbone | ElaB / hypothetical protein; unknown function                                                                                                                       | Inner membrane | 3 | 28% | - | -                                                                                                                                                  |
| 50. | Backbone | GatD / galactitol-1-phosphate dehydrogenase; enzyme; Degradation of small molecules: Carbon compounds                                                               | Inner membrane | 1 | 4%  | - | -                                                                                                                                                  |
| 51. | Backbone | KefC / K <sup>+</sup> efflux antiporter, glutathione-regulated; transport; Transport of small molecules: Cations                                                    | Inner membrane | 1 | 3%  | - | KefC                                                                                                                                               |

|     |               |                                                                                                                                                                                       |                |   |     |   |   |
|-----|---------------|---------------------------------------------------------------------------------------------------------------------------------------------------------------------------------------|----------------|---|-----|---|---|
| 52. | O-island # 57 | Z2112 / putative ClpP-like protease encoded within prophage CP-9330; putative enzyme; Macromolecule degradation: Degradation of proteins, peptides, glyco (Phage or Prophage Related) | Inner membrane | 1 | 7%  | - | - |
| 53. | Backbone      | LacI / transcriptional repressor of the lac operon; regulator; Degradation of small molecules: Carbon compounds                                                                       | Inner membrane | 3 | 11% | - | - |
| 54. | Backbone      | GatZ / putative tagatose 6-phosphate kinase 1; unknown function                                                                                                                       | Inner membrane | 4 | 10% | - | - |
| 55. | Backbone      | AcnB / aconitate hydratase B; Energy metabolism, carbon: TCA cycle                                                                                                                    | Inner membrane | 1 | 2%  | - | - |
| 56. | Backbone      | CydA / cytochrome d terminal oxidase, polypeptide subunit I; Energy metabolism, carbon: Electron transport                                                                            | Inner membrane | 1 | 3%  | - | - |
| 57. | Backbone      | CreD / tolerance to colicin E2; putative membrane; Colicin-related functions                                                                                                          | Inner membrane | 1 | 6%  | - | - |

|     |          |                                                                                                                                                      |                |   |     |   |   |
|-----|----------|------------------------------------------------------------------------------------------------------------------------------------------------------|----------------|---|-----|---|---|
| 58. | Backbone | YgjD / putative O-sialoglycoprotein endopeptidase; unknown function                                                                                  | Inner membrane | 1 | 5%  | - | - |
| 59. | Backbone | Z5187 / putative replicase; Macromolecule synthesis, modification: DNA - replication, repair, restr./modific'n                                       | Inner membrane | 1 | 8%  | - | - |
| 60. | Backbone | YtfQ / putative LACI-type transcriptional regulator; unknown function                                                                                | Inner membrane | 1 | 4%  | - | - |
| 61. | Backbone | FkIB / FKBP-type 22KD peptidyl-prolyl cis-trans isomerase (rotamase); Macromolecule synthesis, modification: Proteins - translation and modification | Inner membrane | 5 | 17% | - | - |
| 62. | Backbone | RpsA / 30S ribosomal subunit protein S1; structural component; Macromolecule synthesis, modification: Ribosomal proteins                             | Inner membrane | 2 | 6%  | - | - |
| 63. | Backbone | Ssb / ssDNA-binding protein; factor; Macromolecule synthesis, modification: DNA - replication, repair, restriction./modification                     | Inner membrane | 5 | 20% | - | - |

|     |          |                                                                                                                                              |                |    |     |                                          |                                                                                   |
|-----|----------|----------------------------------------------------------------------------------------------------------------------------------------------|----------------|----|-----|------------------------------------------|-----------------------------------------------------------------------------------|
| 64. | Backbone | SucC/ succinyl-CoA synthetase, beta subunit; enzyme; Energy metabolism, carbon: TCA cycle                                                    | Inner membrane | 2  | 9%  | -                                        | -                                                                                 |
| 65. | Backbone | RplK / 50S ribosomal subunit protein L11; structural component; Macromolecule synthesis, modification: Ribosomal proteins                    | Inner membrane | 5  | 26% | -                                        | -                                                                                 |
| 66. | Backbone | TpiA / triosephosphate isomerase; enzyme; Energy metabolism, carbon: Glycolysis                                                              | Inner membrane | 1  | 6%  | -                                        | -                                                                                 |
| 67. | Backbone | YgaM / hypothetical protein; unknown function                                                                                                | Inner membrane | 2  | 12% | -                                        | -                                                                                 |
| 68. | Backbone | TrxA / thioredoxin 1; enzyme; biosynthesis of cofactors, carriers: thioredoxin, glutaredoxin, glutathione                                    | Cytoplasm      | 18 | 43% | TrxC / putative thioredoxin-like protein | Ggt / biosynthesis of cofactors, carriers: thioredoxin, glutaredoxin, glutathione |
| 69. | Backbone | DeaD / inducible ATP-independent RNA helicase; enzyme; macromolecule synthesis, modification: RNA synthesis, modification, DNA transcription | Cytoplasm      | 13 | 5%  | -                                        | -                                                                                 |
| 70. | Backbone | DpS / DNA protection during starvation protein; global regulatory functions                                                                  | Cytoplasm      | 2  | 22% | -                                        | -                                                                                 |

|     |          |                                                                                                                                  |           |   |    |   |                                                                                                                                                                 |
|-----|----------|----------------------------------------------------------------------------------------------------------------------------------|-----------|---|----|---|-----------------------------------------------------------------------------------------------------------------------------------------------------------------|
| 71. | Backbone | Tpx / thiol peroxidase; enzyme; protection responses: detoxification                                                             | Cytoplasm | 1 | 9% | - | -                                                                                                                                                               |
| 72. | Backbone | AceE / pyruvate dehydrogenase (decarboxylase component); enzyme; energy metabolism                                               | Cytoplasm | 2 | 4% | - | -                                                                                                                                                               |
| 73. | Backbone | Gnd / gluconate-6-phosphate dehydrogenase, decarboxylating; enzyme; energy metabolism, carbon: oxidative branch, pentose pathway | Cytoplasm | 2 | 6% | - | -                                                                                                                                                               |
| 74. | Backbone | MalP / maltodextrin phosphorylase; enzyme; degradation of small molecules: carbon compounds                                      | Cytoplasm | 3 | 5% | - | Mal F / maltose permease, MalS / alpha amylase, MaLY / enzyme that may degrade or block biosynthesis of endogenous mal inducer, MalZ / maltodextrin glucosidase |
| 75. | Backbone | HfIC / protease specific for phage lambda cII repressor; enzyme; macromolecule degradation: degradation of proteins, peptides    | Cytoplasm | 1 | 5% | - | HfIX / GTP-binding subunit of protease specific for phage lambda cII repressor                                                                                  |



|     |          |                                                                                                                                                |           |   |     |   |                                                       |
|-----|----------|------------------------------------------------------------------------------------------------------------------------------------------------|-----------|---|-----|---|-------------------------------------------------------|
| 76. | Backbone | Eno / enolase; enzyme; energy metabolism, carbon: glycolysis, anaerobic respiration, gluconeogenesis                                           | Cytoplasm | 2 | 7%  | - | -                                                     |
| 77. | Backbone | MopB / GroES; 10 Kd chaperone binds to Hsp60 in presence of Mg-ATP, suppressing its ATPase activity; folding and ushering proteins: Chaperones | Cytoplasm | 1 | 13% | - | MopB                                                  |
| 78. | Backbone | Z3260 / hypothetical protein; unknown function; putative fructose bis-phosphate aldolase                                                       | Cytoplasm | 1 | 6%  | - | -                                                     |
| 79. | Backbone | Add / adenosine deaminase; enzyme; central intermediary metabolism: salvage of nucleosides and nucleotides                                     | Cytoplasm | 1 | 10% | - | -                                                     |
| 80. | Backbone | DnaK / chaperone Hsp70; DNA biosynthesis; autoregulated heat shock proteins; folding and ushering proteins: chaperones                         | Cytoplasm | 4 | 9%  | - | Z2654 / putative chaperone distantly related to Hsp70 |
| 81. | Backbone | Pnp / polynucleotide phosphorylase; cytidylate kinase; macromolecule synthesis, modification: RNA synthesis, modification, DNA transcription   | Cytoplasm | 2 | 6%  | - | -                                                     |

|     |          |                                                                                                                                                                                                 |           |   |     |   |   |
|-----|----------|-------------------------------------------------------------------------------------------------------------------------------------------------------------------------------------------------|-----------|---|-----|---|---|
| 82. | Backbone | RpsE / 30S ribosomal subunit protein S5; protein synthesis, modification                                                                                                                        | Cytoplasm | 2 | 13% | - | - |
| 83. | Backbone | RpsG / 30S ribosomal subunit protein S7, initiates assembly; protein synthesis, modification                                                                                                    | Cytoplasm | 1 | 8%  | - | - |
| 84. | Backbone | RpsH / 30S ribosomal subunit protein S8, initiates assembly; protein synthesis, modification                                                                                                    | Cytoplasm | 1 | 12% | - | - |
| 85. | Backbone | TnaA / tryptophanase; degradation of small molecules: amino acids                                                                                                                               | Cytoplasm | 3 | 9%  | - | - |
| 86. | Backbone | LpdA / lipoamide dehydrogenase (NADH); component of 2-oxodehydrogenase and pyruvate complexes; L-protein of glycine cleavage complex; enzyme; energy metabolism, carbon: pyruvate dehydrogenase | Cytoplasm | 4 | 17% | - | - |
| 87. | Backbone | TufA / protein chain elongation factor EF-Tu ; macromolecule synthesis, modification: proteins - translation and modification                                                                   | Cytoplasm | 2 | 10% | - | - |

|     |          |                                                                                                                                   |           |   |     |   |      |
|-----|----------|-----------------------------------------------------------------------------------------------------------------------------------|-----------|---|-----|---|------|
| 88. | Backbone | Ftn (FtnA) / ferritin (an iron storage protein) ; carrier; transport of small molecules: cations                                  | Cytoplasm | 1 | 9%  | - | -    |
| 89. | Backbone | DapD / 2,3,4,5-tetrahydropyridine-2-carboxylate N-succinyltransferase; enzyme; amino acid biosynthesis: lysine                    | Cytoplasm | 1 | 5%  | - | DapD |
| 90. | Backbone | AceF / pyruvate dehydrogenase (dihydropyridyltransacetylase component); enzyme; energy metabolism, carbon: pyruvate dehydrogenase | Cytoplasm | 3 | 6%  | - | -    |
| 91. | Backbone | AdhP / alcohol dehydrogenase; enzyme; energy metabolism, carbon: anaerobic respiration                                            | Cytoplasm | 1 | 7%  | - | AdhP |
| 92. | Backbone | Z1099 / hypothetical protein; unknown function                                                                                    | Cytoplasm | 1 | 13% | - | -    |
| 93. | Backbone | Tsf / protein chain elongation factor EF-Ts; macromolecule synthesis, modification: proteins - translation and modification       | Cytoplasm | 1 | 7%  | - | -    |
| 94. | Backbone | RpoE / RNA polymerase, sigma-E factor; heat shock and oxidative stress; regulator; global regulatory functions                    | Cytoplasm | 1 | 9%  | - | -    |

|      |          |                                                                                                                                                     |           |   |     |                                                     |                                                   |
|------|----------|-----------------------------------------------------------------------------------------------------------------------------------------------------|-----------|---|-----|-----------------------------------------------------|---------------------------------------------------|
| 95.  | Backbone | YqjD / hypothetical protein;<br>unknown function                                                                                                    | Cytoplasm | 1 | 18% | -                                                   | -                                                 |
| 96.  | Backbone | FabG / 3-oxoacyl-[acyl-carrier-<br>protein] reductases; enzyme;<br>fatty acid and phosphatidic acid<br>biosynthesis                                 | Cytoplasm | 1 | 10% | -                                                   | -                                                 |
| 97.  | Backbone | CreA / hypothetical protein;<br>unknown function                                                                                                    | Cytoplasm | 1 | 9%  | -                                                   | -                                                 |
| 98.  | Backbone | LacZ / beta-D-galactosidase;<br>enzyme; degradation of small<br>molecules: carbon compounds                                                         | Cytoplasm | 1 | 6%  | -                                                   | -                                                 |
| 99.  | Backbone | OrdL / putative oxidoreductase;<br>function unknown                                                                                                 | Cytoplasm | 1 | 4%  | Z2702 / putative<br>oxidoreductase,<br>Fe-S subunit | YhjL, Z2723, Z3401<br>/putative<br>oxidoreductase |
| 100. | Backbone | FldA / flavodoxin 1; enzyme;<br>energy metabolism, carbon:<br>electron transport                                                                    | Cytoplasm | 1 | 11% | -                                                   | Z4018 / putative<br>flavodoxin                    |
| 101. | Backbone | FusA / GTP-binding protein<br>chain elongation factor<br>EF-G; macromolecule synthesis,<br>modification: proteins -<br>translation and modification | Cytoplasm | 1 | 2%  | -                                                   | -                                                 |

|      |          |                                                                                                                                                                           |           |   |     |   |                                                         |
|------|----------|---------------------------------------------------------------------------------------------------------------------------------------------------------------------------|-----------|---|-----|---|---------------------------------------------------------|
| 102. | Backbone | RpoA / RNA polymerase, alpha subunit ; enzyme; macromolecule synthesis, modification: RNA synthesis, modification, DNA transcription                                      | Cytoplasm | 1 | 4%  | - | -                                                       |
| 103. | Backbone | YhdH / putative dehydrogenase ; unknown function                                                                                                                          | Cytoplasm | 1 | 4%  | - | YgjL, YidS, YliL, Z3775, Z4220 / putative dehydrogenase |
| 104. | Backbone | SucA / 2-oxoglutarate dehydrogenase (decarboxylase component); enzyme; energy metabolism, carbon: TCA cycle                                                               | Cytoplasm | 1 | 2%  | - | -                                                       |
| 105. | Backbone | AdhE / CoA-linked acetaldehyde dehydrogenase and iron-dependent alcohol dehydrogenase; pyruvate-formate-lyase deactivase; enzyme; energy metabolism, carbon: fermentation | Cytoplasm | 1 | 2%  | - | -                                                       |
| 106. | Backbone | Pgk / phosphoglycerate kinase; enzyme; energy metabolism, carbon: glycolysis                                                                                              | Cytoplasm | 1 | 6%  | - | -                                                       |
| 107. | Backbone | RplO / 50S ribosomal protein L15; protein synthesis, modification                                                                                                         | Cytoplasm | 1 | 11% | - | -                                                       |

|      |          |                                                                                                                     |           |   |     |   |                                                                                                                                                                          |
|------|----------|---------------------------------------------------------------------------------------------------------------------|-----------|---|-----|---|--------------------------------------------------------------------------------------------------------------------------------------------------------------------------|
| 108. | Backbone | RplN / 50S ribosomal protein L14; protein synthesis, modification                                                   | Cytoplasm | 2 | 33% | - | -                                                                                                                                                                        |
| 109. | Backbone | RplL / 50S ribosomal protein L7/L12 ; protein synthesis, modification                                               | Cytoplasm | 2 | 10% | - | -                                                                                                                                                                        |
| 110. | Backbone | RplJ / 50S ribosomal protein L10; protein synthesis, modification                                                   | Cytoplasm | 1 | 9%  | - | -                                                                                                                                                                        |
| 111. | Backbone | RplF / 50S ribosomal protein L6; protein synthesis, modification                                                    | Cytoplasm | 1 | 9%  | - | -                                                                                                                                                                        |
| 112. | Backbone | RplC / 50S ribosomal protein L3; protein synthesis, modification                                                    | Cytoplasm | 1 | 10% | - | -                                                                                                                                                                        |
| 113. | Backbone | YnaF / putative universal stress protein; unknown function                                                          | Cytoplasm | 1 | 11% | - | -                                                                                                                                                                        |
| 114. | Backbone | MalQ / 4-alpha-glucanotransferase (amylomaltase); enzyme; macromolecule degradation: degradation of polysaccharides | Cytoplasm | 2 | 6%  | - | Mal F / maltose permease,<br>MalS / alpha amylase,<br>MaLY / enzyme that may degrade or block biosynthesis of endogenous mal inducer,<br>MalZ / maltodextrin glucosidase |

|      |          |                                                                                                                                             |           |    |     |   |                                                                        |
|------|----------|---------------------------------------------------------------------------------------------------------------------------------------------|-----------|----|-----|---|------------------------------------------------------------------------|
| 115. | Backbone | YhbP / hypothetical protein;<br>unknown function                                                                                            | Cytoplasm | 1  | 8%  | - | -                                                                      |
| 116. | Backbone | OsmC / osmotically inducible<br>protein; phenotype; osmotic<br>adaptation                                                                   | Cytoplasm | 1  | 15% | - | OsmY /<br>hyperosmotically<br>inducible protein;<br>osmotic adaptation |
| 117. | Backbone | Hns / DNA-binding protein HLP-<br>II (HU, BH2, HD, NS);<br>pleiotropic regulator; regulator;<br>basic proteins - synthesis,<br>modification | Cytoplasm | 3  | 17% | - | -                                                                      |
| 118. | Backbone | SbmC / hypothetical protein;<br>unknown function                                                                                            | Cytoplasm | 1  | 12% | - | -                                                                      |
| 119. | Backbone | AtpA / membrane-bound ATP<br>synthase, F1 sector, alpha-<br>subunit; enzyme; ATP-proton<br>motive force interconversion                     | Cytoplasm | 11 | 23% | - | -                                                                      |
| 120. | Backbone | AtpG / membrane-bound ATP<br>synthase, F1 sector, gamma-<br>subunit; enzyme; ATP-proton<br>motive force interconversion                     | Cytoplasm | 1  | 4%  | - | -                                                                      |
| 121. | Backbone | MopA / GroEL, chaperone<br>Hsp60, peptide-dependent<br>ATPase, heat shock protein;<br>Folding and ushering proteins:<br>Chaperones          | Cytoplasm | 6  | 17% | - | -                                                                      |

|      |          |                                                                                                                                                    |           |   |     |                  |                                                                                                                                 |
|------|----------|----------------------------------------------------------------------------------------------------------------------------------------------------|-----------|---|-----|------------------|---------------------------------------------------------------------------------------------------------------------------------|
| 122. | Backbone | Crp / cyclic AMP receptor protein; regulator; Global regulatory functions                                                                          | Cytoplasm | 2 | 12% | -                | -                                                                                                                               |
| 123. | Backbone | CspA / cold shock protein 7.4, transcriptional activator of hns; regulator; Adaptations, atypical conditions                                       | Cytoplasm | 1 | 20% | -                | -                                                                                                                               |
| 124. | Backbone | CspC / cold shock protein; unknown function                                                                                                        | Cytoplasm | 3 | 20% | 5'of <i>cspC</i> | -                                                                                                                               |
| 125. | Backbone | CysN / ATP-sulfurylase (ATP:sulfate adenylyltransferase), subunit 1, probably a GTPase; enzyme; Central intermediary metabolism: Sulfur metabolism | Cytoplasm | 1 | 3%  | -                | CysD / ATP:sulfurylase (ATP:sulfate adenylyltransferase), subunit 2; enzyme; Central intermediary metabolism: Sulfur metabolism |
| 126. | Backbone | HupA / DNA-binding protein HU-alpha (HU-2); Basic proteins - synthesis, modification                                                               | Cytoplasm | 4 | 32% | -                | -                                                                                                                               |
| 127. | Backbone | FrdB / fumarate reductase, anaerobic, iron-sulfur protein subunit; enzyme; Energy metabolism, carbon: Anaerobic respiration                        | Cytoplasm | 1 | 4%  | -                | -                                                                                                                               |



|      |          |                                                                                                                          |           |   |     |   |                                                                                                                                                                                             |
|------|----------|--------------------------------------------------------------------------------------------------------------------------|-----------|---|-----|---|---------------------------------------------------------------------------------------------------------------------------------------------------------------------------------------------|
| 128. | Backbone | GapA / glyceraldehyde-3-phosphate dehydrogenase A; enzyme; Energy metabolism, carbon: Glycolysis                         | Cytoplasm | 5 | 22% | - | -                                                                                                                                                                                           |
| 129. | Backbone | FoIE / GTP cyclohydrolase I; enzyme; Biosynthesis of cofactors, carriers: Folic acid                                     | Cytoplasm | 2 | 13% | - | FoIE                                                                                                                                                                                        |
| 130. | Backbone | GlnA / glutamine synthetase; enzyme; Amino acid biosynthesis: Glutamine                                                  | Cytoplasm | 1 | 3%  | - | GlnG / response regulator for <i>gln</i> operon; interacts with sensor GlnL<br>GlnL / histidine protein kinase sensor for the GlnG regulator<br>Both are involved in glutamine biosynthesis |
| 131. | Backbone | GpmA / phosphoglyceromutase 1; enzyme; Energy metabolism, carbon: Glycolysis                                             | Cytoplasm | 2 | 11% | - | -                                                                                                                                                                                           |
| 132. | Backbone | GrpE / phage lambda replication; host DNA synthesis; heat shock protein; protein repair; IS, phage, Tn; Other or unknown | Cytoplasm | 1 | 8%  | - | -                                                                                                                                                                                           |

|      |          |                                                                                                                                                                             |           |   |     |   |                                                                              |
|------|----------|-----------------------------------------------------------------------------------------------------------------------------------------------------------------------------|-----------|---|-----|---|------------------------------------------------------------------------------|
| 133. | Backbone | HisB / imidazoleglycerolphosphate dehydratase and histidinolphosphate phosphatase; enzyme; Amino acid biosynthesis: Histidine                                               | Cytoplasm | 1 | 5%  | - | HisS/ histidine tRNA synthetase; enzyme; Amino acyl tRNA syn; tRNA modific'n |
| 134. | Backbone | HslV / heat shock protein hslVU, proteasome-related peptidase subunit; enzyme; macromolecule degradation: Degradation of proteins, peptides, glyco                          | Cytoplasm | 1 | 7%  | - | -                                                                            |
| 135. | Backbone | IbpA / heat shock protein; factor; Adaptations, atypical conditions                                                                                                         | Cytoplasm | 1 | 9%  | - | -                                                                            |
| 136. | Backbone | IbpB / heat shock protein; factor; Adaptations, atypical conditions                                                                                                         | Cytoplasm | 2 | 8%  | - | -                                                                            |
| 137. | Backbone | InfC / Initiation factor IF-3; Macromolecule synthesis, modification: Proteins - translation and modification                                                               | Cytoplasm | 2 | 34% | - | -                                                                            |
| 138. | Backbone | HimD / integration host factor (IHF), beta subunit; site-specific recombination; factor; Macromolecule synthesis, modification: DNA - replication, repair, restr./modific'n | Cytoplasm | 2 | 13% | - | -                                                                            |

|      |          |                                                                                                                                                                            |           |   |     |   |                                                                                                                                                                                             |
|------|----------|----------------------------------------------------------------------------------------------------------------------------------------------------------------------------|-----------|---|-----|---|---------------------------------------------------------------------------------------------------------------------------------------------------------------------------------------------|
| 139. | Backbone | AdK / adenylate kinase activity; pleiotropic effects on glycerol-3-phosphate acyltransferase activity; enzyme; Nucleotide biosynthesis: Purine ribonucleotide biosynthesis | Cytoplasm | 4 | 12% | - | -                                                                                                                                                                                           |
| 140. | Backbone | MalK / ATP-binding component of transport system for maltose; transport; Transport of small molecules: Carbohydrates, organic acids, alcohols                              | Cytoplasm | 1 | 3%  | - | Mal F / maltose permease, MalS / alpha amylase, MaLY / enzyme that may degrade or block biosynthesis of endogenous mal inducer, MalZ / maltodextrin glucosidase                             |
| 141. | Backbone | MukE / hypothetical protein; Unknown function                                                                                                                              | Cytoplasm | 1 | 9%  | - | -                                                                                                                                                                                           |
| 142. | Backbone | NuoB / NADH dehydrogenase I chain B; enzyme; Energy metabolism, carbon: Aerobic respiration                                                                                | Cytoplasm | 1 | 4%  | - | NuoL / NADH dehydrogenase I chain L ; enzyme; Energy metabolism, carbon: Aerobic respiration<br>NuoM / NADH dehydrogenase I chain M; enzyme; Energy metabolism, carbon: Aerobic respiration |

|      |          |                                                                                                                              |           |   |     |   |                                                                                              |
|------|----------|------------------------------------------------------------------------------------------------------------------------------|-----------|---|-----|---|----------------------------------------------------------------------------------------------|
| 143. | Backbone | NuoG / NADH dehydrogenase I chain G; enzyme; Energy metabolism, carbon: Aerobic respiration                                  | Cytoplasm | 1 | 1%  | - | NuoL / NADH dehydrogenase I chain L ; enzyme; Energy metabolism, carbon: Aerobic respiration |
| 144. | Backbone | SucB / 2-oxoglutarate dehydrogenase (dihydrolipoyltranssuccinase E2 component); enzyme; Energy metabolism, carbon: TCA cycle | Cytoplasm | 7 | 12% | - | NuoM / NADH dehydrogenase I chain M; enzyme; Energy metabolism, carbon: Aerobic respiration  |
| 145. | Backbone | PckA / phosphoenolpyruvate carboxykinase; enzyme; Central intermediary metabolism: Gluconeogenesis                           | Cytoplasm | 1 | 1%  | - |                                                                                              |
| 146. | Backbone | PPk / polyphosphate kinase; enzyme; Central intermediary metabolism: Phosphorus compounds                                    | Cytoplasm | 1 | 3%  | - |                                                                                              |

|      |               |                                                                                                                                    |           |   |     |   |   |
|------|---------------|------------------------------------------------------------------------------------------------------------------------------------|-----------|---|-----|---|---|
| 147. | Backbone      | ProQ / ProQ protein that influences osmotic activation of ProP; putative factor; Transport of small molecules: Amino acids, amines | Cytoplasm | 1 | 30% | - | - |
| 148. | Backbone      | PyrG / CTP synthetase; enzyme; Central intermediary metabolism: Nucleotide interconversions                                        | Cytoplasm | 1 | 2%  | - | - |
| 149. | O-island # 57 | Z2118 / putative endopeptidase Rz of prophage CP-933O; putative enzyme; Lysis (Phage or Prophage Related)                          | Cytoplasm | 1 | 14% | - | - |
| 150. | O-island # 50 | Z1824 / hypothetical protein encoded by prophage CP-933N; unknown function                                                         | Cytoplasm | 1 | 1%  | - | - |
| 151. | Backbone      | FumB / fumarase B= fumarate hydratase Class I; anaerobic isozyme; enzyme; Energy metabolism, carbon: TCA cycle                     | Cytoplasm | 1 | 2%  | - | - |
| 152. | Backbone      | AceA / isocitrate lyase; enzyme; Central intermediary metabolism: Glyoxylate bypass                                                | Cytoplasm | 1 | 4%  | - | - |

|      |          |                                                                                                                                    |           |   |     |   |      |
|------|----------|------------------------------------------------------------------------------------------------------------------------------------|-----------|---|-----|---|------|
| 153. | Backbone | TopA / DNA topoisomerase type I, omega protein; Macromolecule synthesis, modification: DNA - replication, repair, restr./modific'n | Cytoplasm | 1 | 1%  | - | TopA |
| 154. | Backbone | PepD / aminoacyl-histidine dipeptidase (peptidase D); Macromolecule degradation: Degradation of proteins, peptides, glyco          | Cytoplasm | 2 | 5%  | - | -    |
| 155. | Backbone | Udp / uridine phosphorylase; Central intermediary metabolism: Salvage of nucleosides and nucleotides                               | Cytoplasm | 1 | 5%  | - | -    |
| 156. | Backbone | YgaU / hypothetical protein; unknown function                                                                                      | Cytoplasm | 6 | 39% | - | -    |
| 157. | Backbone | DnaJ / chaperone with DnaK; heat shock protein; Folding and ushering proteins: Chaperones                                          | Cytoplasm | 2 | 4%  | - | -    |
| 158. | Backbone | Crr / PTS system, glucose-specific IIA component; Transport of small molecules: Carbohydrates, organic acids, alcohols             | Cytoplasm | 4 | 62% | - | -    |

|      |                   |                                                                                                                                                              |           |   |    |   |                                               |
|------|-------------------|--------------------------------------------------------------------------------------------------------------------------------------------------------------|-----------|---|----|---|-----------------------------------------------|
| 159. | O-island #<br>122 | Z4317 / unknown protein encoded by ISEc8; Unknown function (Insertion Sequence Associated)                                                                   | Cytoplasm | 1 | 1% | - | -                                             |
| 160. | Backbone          | Z1419 / hypothetical protein; unknown function                                                                                                               | Cytoplasm | 1 | 6% | - | -                                             |
| 161. | Backbone          | yjgF / hypothetical protein; unknown function                                                                                                                | Cytoplasm | 1 | 8% | - | -                                             |
| 162. | Backbone          | PpiB / peptidyl-prolyl cis-trans isomerase B (rotamase B); Macromolecule synthesis, modification: Proteins - translation and modification                    | Cytoplasm | 1 | 8% | - | -                                             |
| 163. | Backbone          | YIbA / hypothetical proteins; unknown function                                                                                                               | Cytoplasm | 1 | 4% | - | -                                             |
| 164. | Backbone          | ChaC / cation transport regulator; Transport of small molecules: Cations                                                                                     | Cytoplasm | 1 | 8% | - | -                                             |
| 165. | Backbone          | SgaU / putative hexulose-6-phosphate isomerase; putative enzyme; Central intermediary metabolism: Pool, multipurpose conversions of intermediary metabolites | Cytoplasm | 1 | 6% | - | SgaB / hypothetical protein; unknown function |

|      |          |                                                                                                                                                                |           |   |     |   |   |
|------|----------|----------------------------------------------------------------------------------------------------------------------------------------------------------------|-----------|---|-----|---|---|
| 166. | Backbone | MelA / alpha-galactosidase; enzyme; Degradation of small molecules: Carbon compounds                                                                           | Cytoplasm | 1 | 2%  | - | - |
| 167. | Backbone | Z2778 / putative aldehyde dehydrogenase; unknown function                                                                                                      | Cytoplasm | 1 | 3%  | - | - |
| 168. | Backbone | KatE / catalase; hydroperoxidase HP11(III); enzyme; Protection responses: detoxification                                                                       | Cytoplasm | 1 | 2%  | - | - |
| 169. | Backbone | Rp1Y / 50S ribosomal subunit protein L25; structural component; Macromolecule synthesis, modification: Ribosomal proteins                                      | Cytoplasm | 1 | 16% | - | - |
| 170. | Backbone | Rh1B / putative ATP-dependent RNA helicase; unknown function                                                                                                   | Cytoplasm | 1 | 2%  | - | - |
| 171. | Backbone | Z0516 / riboflavin synthase subunit beta; 6,7-dimethyl-8-ribityllumazine synthase /note=DMRL_synthase; enzyme; Biosynthesis of cofactors, carriers: Riboflavin | Cytoplasm | 1 | 10% | - | - |



|      |          |                                                                                                                                                             |           |    |     |   |   |
|------|----------|-------------------------------------------------------------------------------------------------------------------------------------------------------------|-----------|----|-----|---|---|
| 172. | Backbone | RplA / 50S ribosomal subunit protein L1, regulates synthesis of L1 and L11; structural component; Macromolecule synthesis, modification: Ribosomal proteins | Cytoplasm | 10 | 52% | - | - |
| 173. | Backbone | RplP / 50S ribosomal subunit protein L16; structural component; Macromolecule synthesis, modification: Ribosomal proteins                                   | Cytoplasm | 1  | 12% | - | - |
| 174. | Backbone | RplQ / 50S ribosomal subunit protein L17; structural component; Macromolecule synthesis, modification: Ribosomal proteins                                   | Cytoplasm | 2  | 24% | - | - |
| 175. | Backbone | RplR / 50S ribosomal subunit protein L18; structural component; Macromolecule synthesis, modification: Ribosomal proteins                                   | Cytoplasm | 2  | 9%  | - | - |
| 176. | Backbone | RplS / 50S ribosomal subunit protein L19; structural component; Macromolecule synthesis, modification: Ribosomal proteins                                   | Cytoplasm | 2  | 23% | - | - |

|      |          |                                                                                                                           |           |   |     |   |   |
|------|----------|---------------------------------------------------------------------------------------------------------------------------|-----------|---|-----|---|---|
| 177. | Backbone | RplB / 50S ribosomal subunit protein L2; structural component; Macromolecule synthesis, modification: Ribosomal proteins  | Cytoplasm | 1 | 5%  | - | - |
| 178. | Backbone | RplU / 50S ribosomal subunit protein L21; structural component; Macromolecule synthesis, modification: Ribosomal proteins | Cytoplasm | 1 | 14% | - | - |
| 179. | Backbone | RplX / 50S ribosomal subunit protein L24; structural component; Macromolecule synthesis, modification: Ribosomal proteins | Cytoplasm | 6 | 32% | - | - |
| 180. | Backbone | RpmA / 50S ribosomal subunit protein L27; structural component; Macromolecule synthesis, modification: Ribosomal proteins | Cytoplasm | 1 | 11% | - | - |
| 181. | Backbone | RpmB / 50S ribosomal subunit protein L28; structural component; Macromolecule synthesis, modification: Ribosomal proteins | Cytoplasm | 1 | 15% | - | - |

|      |          |                                                                                                                                                              |           |   |     |   |   |
|------|----------|--------------------------------------------------------------------------------------------------------------------------------------------------------------|-----------|---|-----|---|---|
| 182. | Backbone | RpID / 50S ribosomal subunit protein L4, regulates expression of S10 operon; structural component; Macromolecule synthesis, modification: Ribosomal proteins | Cytoplasm | 4 | 21% | - | - |
| 183. | Backbone | RpIE / 50S ribosomal subunit protein L5; structural component; Macromolecule synthesis, modification: Ribosomal proteins                                     | Cytoplasm | 2 | 9%  | - | - |
| 184. | Backbone | RpIL / 50S ribosomal subunit protein L7/L12; structural component; Macromolecule synthesis, modification: Ribosomal proteins                                 | Cytoplasm | 8 | 38% | - | - |
| 185. | Backbone | RpiA / ribosephosphate isomerase, constitutive; enzyme; Central intermediary metabolism: Non-oxidative branch, pentose pathway                               | Cytoplasm | 2 | 17% | - | - |
| 186. | Backbone | Frr / ribosome releasing factor; factor; Macromolecule synthesis, modification: Proteins - translation and modification                                      | Cytoplasm | 1 | 11% | - | - |

|      |          |                                                                                                                           |           |   |     |   |   |
|------|----------|---------------------------------------------------------------------------------------------------------------------------|-----------|---|-----|---|---|
| 187. | Backbone | RpsJ / 30S ribosomal subunit protein S10; structural component; Macromolecule synthesis, modification: Ribosomal proteins | Cytoplasm | 3 | 40% | - | - |
| 188. | Backbone | RpsK / 30S ribosomal subunit protein S11; structural component; Macromolecule synthesis, modification: Ribosomal proteins | Cytoplasm | 2 | 18% | - | - |
| 189. | Backbone | RpsN / 30S ribosomal subunit protein S14; structural component; Macromolecule synthesis, modification: Ribosomal proteins | Cytoplasm | 1 | 12% | - | - |
| 190. | Backbone | RpsP / 30S ribosomal subunit protein S16; structural component; Macromolecule synthesis, modification: Ribosomal proteins | Cytoplasm | 6 | 41% | - | - |
| 191. | Backbone | RpsQ / 30S ribosomal subunit protein S17; structural component; Macromolecule synthesis, modification: Ribosomal proteins | Cytoplasm | 1 | 8%  | - | - |

|      |          |                                                                                                                           |           |   |     |   |   |
|------|----------|---------------------------------------------------------------------------------------------------------------------------|-----------|---|-----|---|---|
| 192. | Backbone | RpsS / 30S ribosomal subunit protein S19; structural component; Macromolecule synthesis, modification: Ribosomal proteins | Cytoplasm | 2 | 10% | - | - |
| 193. | Backbone | RpsB / 30S ribosomal subunit protein S2; structural component; Macromolecule synthesis, modification: Ribosomal proteins  | Cytoplasm | 1 | 5%  | - | - |
| 194. | Backbone | RpsU / 30S ribosomal subunit protein S21; structural component; Macromolecule synthesis, modification: Ribosomal proteins | Cytoplasm | 1 | 14% | - | - |
| 195. | Backbone | RpsC / 30S ribosomal subunit protein S3; structural component; Macromolecule synthesis, modification: Ribosomal proteins  | Cytoplasm | 7 | 45% | - | - |
| 196. | Backbone | RpsD / 30S ribosomal subunit protein S4; structural component; Macromolecule synthesis, modification: Ribosomal proteins  | Cytoplasm | 6 | 24% | - | - |

|      |          |                                                                                                                                         |           |   |     |   |   |
|------|----------|-----------------------------------------------------------------------------------------------------------------------------------------|-----------|---|-----|---|---|
| 197. | Backbone | RpsL / 30S ribosomal subunit protein S12; structural component; Macromolecule synthesis, modification: Ribosomal proteins               | Cytoplasm | 3 | 17% | - | - |
| 198. | Backbone | SodB / superoxide dismutase, iron; enzyme; Protection responses: Detoxification                                                         | Cytoplasm | 1 | 13% | - | - |
| 199. | Backbone | SucD / succinyl-CoA synthetase, alpha subunit; enzyme; Energy metabolism, carbon: TCA cycle                                             | Cytoplasm | 2 | 8%  | - | - |
| 200. | Backbone | TalB / transaldolase B; enzyme; Central intermediary metabolism: Non-oxidative branch, pentose pathway                                  | Cytoplasm | 6 | 19% | - | - |
| 201. | Backbone | Tig / trigger factor; a molecular chaperone involved in cell division; factor; Cell division                                            | Cytoplasm | 5 | 13% | - | - |
| 202. | Backbone | Z0751 / hypothetical protein/ unknown function                                                                                          | Cytoplasm | 4 | 32% | - | - |
| 203. | Backbone | WrbA / trp repressor binding protein; affects association of trp repressor and operator; regulator; Amino acid biosynthesis: Tryptophan | Cytoplasm | 1 | 10% | - | - |

|      |          |                                                  |           |   |     |   |   |
|------|----------|--------------------------------------------------|-----------|---|-----|---|---|
| 204. | Backbone | YaiE / hypothetical protein/<br>unknown function | Cytoplasm | 2 | 14% | - | - |
| 205. | Backbone | YbaA / hypothetical protein/<br>unknown function | Cytoplasm | 1 | 15% | - | - |
| 206. | Backbone | YdfH / hypothetical protein/<br>unknown function | Cytoplasm | 1 | 7%  | - | - |
| 207. | Backbone | YjbJ / hypothetical protein/<br>unknown function | Cytoplasm | 4 | 46% | - | - |

---

<sup>1</sup> Based on homology to the sequenced, *E. coli* O157 strain EDL933 genome, and plasmid, pO157.

<sup>2</sup> Putative functions assigned to hypothetical proteins using the Conserved Domain Database (CDD).

<sup>3</sup> Bacterial cell localization of proteins determined by PSORTb v.2.0/PSLpred/ PSORTdb, and SignalP 3.0 prediction program.

<sup>4</sup> STM, signature tagged mutagenesis <sup>9</sup>; IVIAT, *in vivo* induced antigen technology <sup>6</sup>.
